# Supplementary material for: Optimal multi-source forecasting of seasonal influenza
Source: PubMed Central journal article supplement (PMC6138397; doi:10.1371/journal.pcbi.1006236), 2018-09-04
Supplement: pcbi.1006236.s001.pdf [file pcbi.1006236.s001.pdf]

---

# 1 Pseudo-code for hierarchical selection of data sources for influenza forecasting

---

**S1 Algorithm.** Hierarchical data source selection.

---

- 1: **Given** : Set of predictor data sources  $\mathbf{D}$  and forecasting target  $G$
  - 2:  $\mathbf{D}_{chosen} : \{D_1, D_2, D_3, \dots, D_{n-1}\}$
  - 3:  $\mathbf{D}_{remaining} : \mathbf{D} \setminus \mathbf{D}_{chosen}$
  - 4: To choose  $D_n$ ,
  - 5: **for**  $q \in \mathbf{D}_{remaining}$  **do**
  - 6:     Fit  $\Omega_q : G \sim D_1 + D_2 + \dots + D_{n-1} + q$  on the full historical time series.
  - 7:      $\mathbf{S}$ : historical seasons of  $G$
  - 8:     **for**  $s_i \in \mathbf{S}$  **do**
  - 9:         **for**  $d \in \mathbf{D}_{chosen} \cup q$  **do**
  - 10:             Make Bayes' forecast of  $s_i$  for  $d$  from week  $w$ , with  $(\mathbf{S} \setminus s_i)$  as priors.
  - 11:             Apply  $\Omega_q$  to forecast  $G$  for season  $s_i$  from forecasts generated in Step 10.
  - 12:             Score forecast from Step 11 by comparison to actual  $G$  (call this score  $\sigma(q, i)$ ).
  - 13:     Calculate the grand score  $\sum_{s_i} \sigma(q, i)$ .
  - 14: Choose  $q$  that maximizes the grand score.
  - 15: Set  $D_n = q$ .
-
